# Supplementary material for: Constructing H+-triggered bubble generating nano-drug delivery systems using bicarbonate and carbonate
Source: Royal Society of Chemistry journal article supplement (doi:10.1039/c6ra19863e), 2016-01-01
Supplement: c6ra19863e1.pdf [file c6ra19863e1.pdf]

**Electronic Supplementary Information**  
**Constructing H<sup>+</sup>-Trigger Bubble-Generating Nano-Drug**  
**Delivery Systems using Bicarbonate and Carbonate**

Zhuang Wen,<sup>a</sup> Yijuan Long,<sup>a</sup> Lili Yang,<sup>a</sup> Jiangang Hu,<sup>b</sup> Ning Huang,<sup>b</sup>  
Yuan Cheng,<sup>b</sup> Li Zhao,<sup>c</sup> and Huzhi Zheng<sup>\*a</sup>

*a* Key Laboratory on Luminescent and Real-Time Analytical Chemistry(Southwest University), College of Chemistry and Chemical Engineering Southwest University, Beibei, Chongqing, 400715, China. E-mail: [zhenghz@swu.edu.cn](mailto:zhenghz@swu.edu.cn)

*b* Department of Neurosurgery, the Second Affiliated Hospital of Chongqing Medical University Chongqing, 400010, P. R. China.

*c* Southwest University Hospital, Southwest University, Beibei ,Chongqing, 400715, China

† Electronic Supplementary Information (ESI) available: Table. S1; Fig. S1 – S5

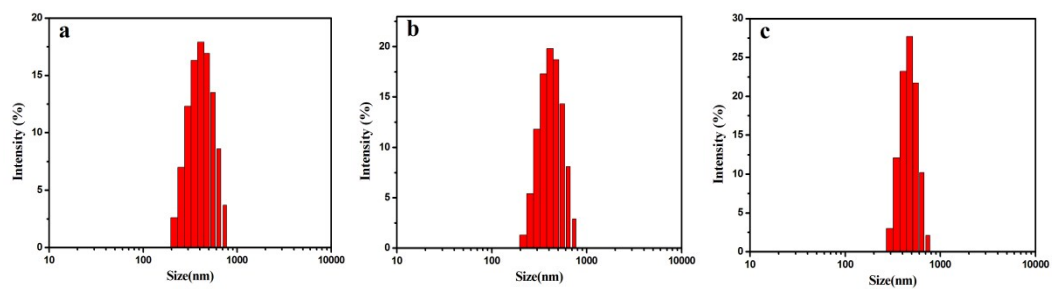

**Fig. S1.** Particle size distributions of the HMSNs (a), BGNSs-AC (b) and BGNSs-SBC (c) in water, as measured by dynamic light scattering (DLS).

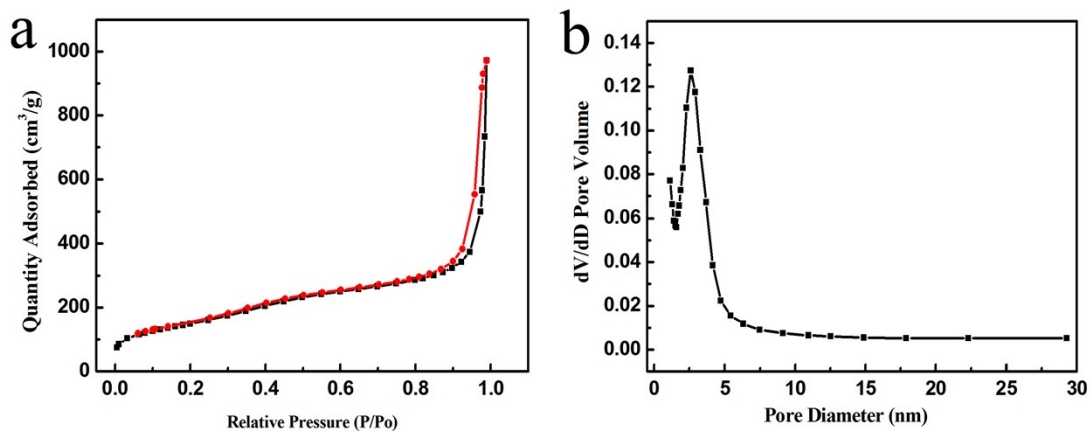

**Fig. S2.** Nitrogen adsorption–desorption isotherms of HMSNs (a) and pore size distribution of HMSNs (b).

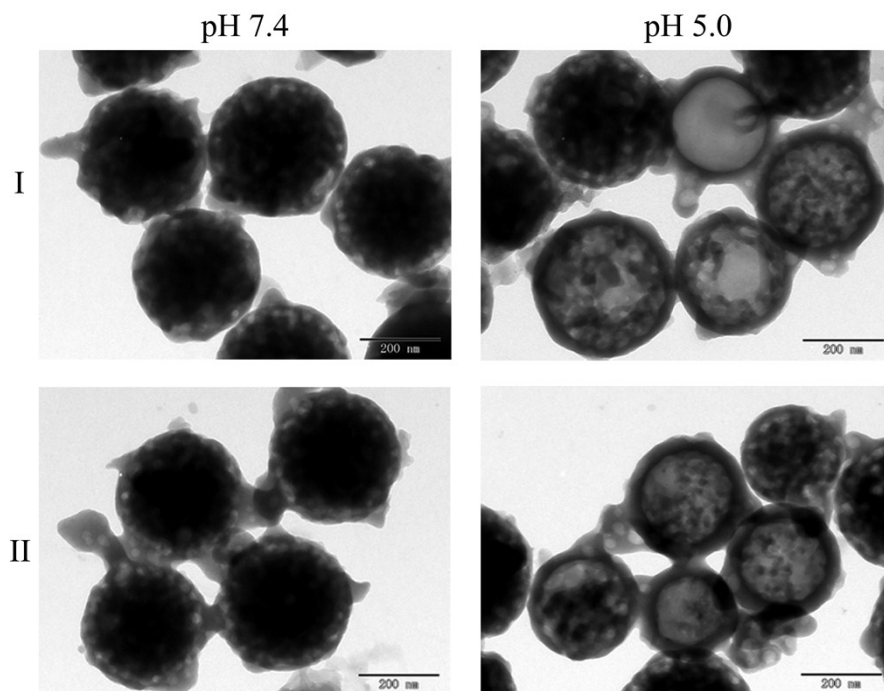

**Fig. S3.** TEM images of BGNSs-AC (I) and BGNSs-SBC (II) after incubation for 24 h in PBS 7.4 and 5.0.

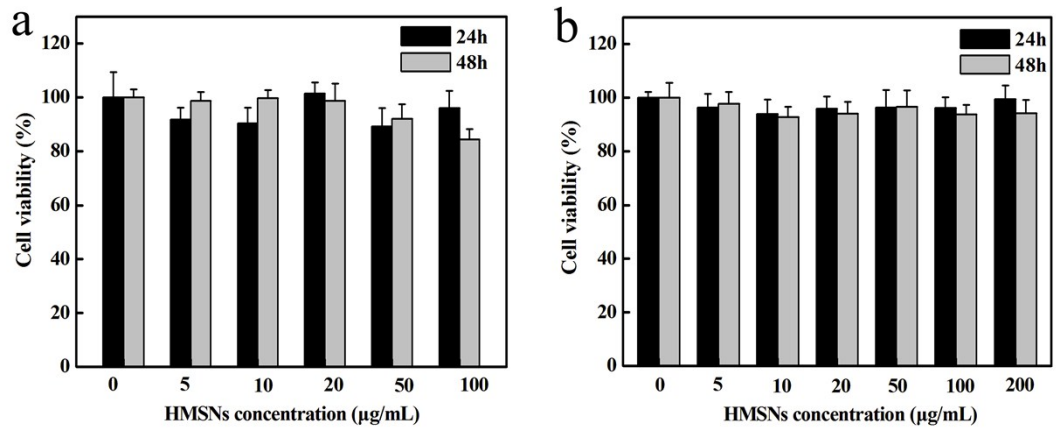

**Fig.S4.** Cytotoxicity of HMSNs against MCF-7 cells (a) and MCF-7/ADR cells (b).

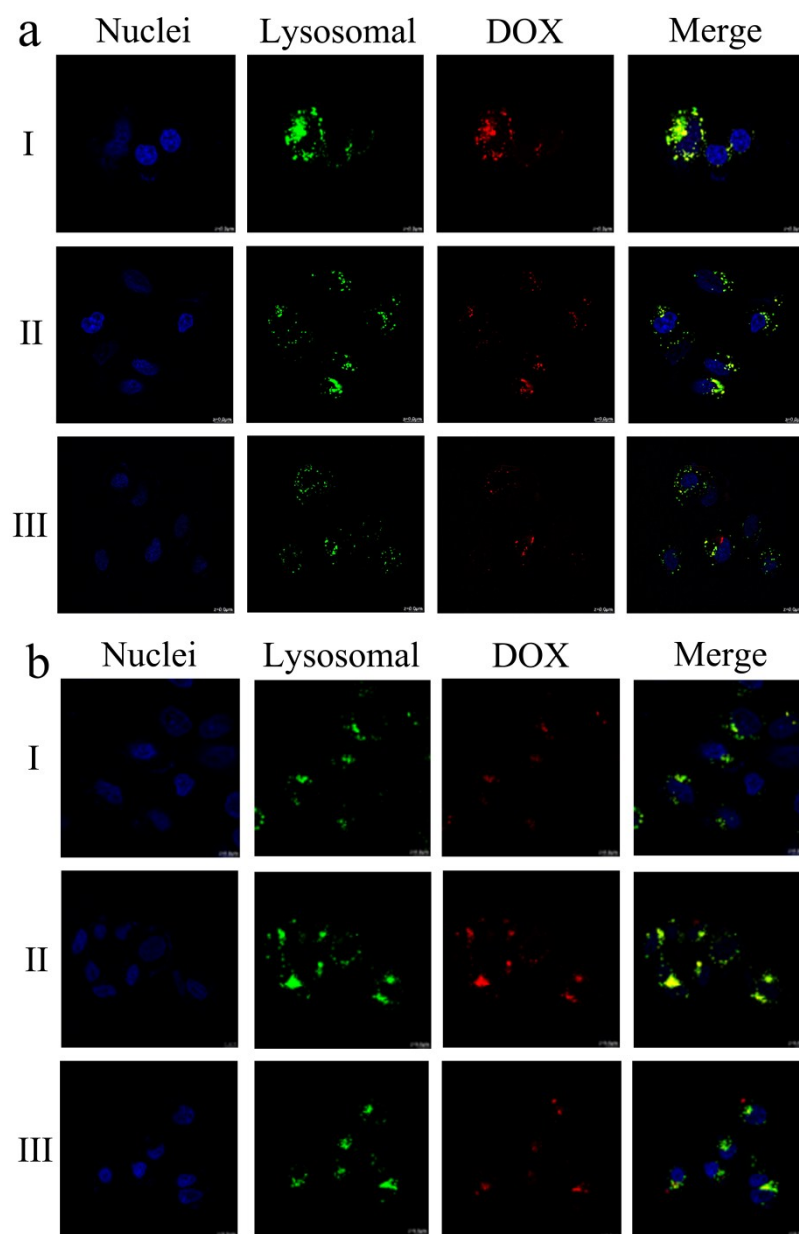

**Fig. S5.** CLSM images of the accumulation of DOX in MCF-7 cells after incubating with free DOX (I), BGNSs-AC (II) and BGNSs-SBCA (III) for 4 h (a), 24 h (b).

**Table. S1** The zeta potential and the DLS size of different nanocarriers.

| Sample    | Zeta-Potential (mV) | DLS diameter (nm) | PDI   |
|-----------|---------------------|-------------------|-------|
| HMSNs     | $-25.4 \pm 4.84$    | $391.2 \pm 35.3$  | 0.141 |
| BGNSs-AC  | $-22.1 \pm 3.74$    | $412.5 \pm 55.2$  | 0.201 |
| BGNSs-SBC | $-8.67 \pm 3.75$    | $430.4 \pm 47.3$  | 0.186 |
